# Supplementary material
Source: PubMed Central journal article supplement (PMC9266506)
Supplement: sj-pdf-1-vdi-10.1177_10406387221102899.pdf [file sj-pdf-1-vdi-10.1177_10406387221102899.pdf]

Elbert JA, Rissi DR. Neuropathologic changes associated with systemic bacterial infection in 28 dogs

**Supplemental Table 1.** Signalment, clinical signs, and clinical outcome in 28 cases of systemic bacterial infection with neurologic involvement in dogs.

| Case | Age  | Sex | Breed              | Clinical signs                                                  | Clinical outcome |
|------|------|-----|--------------------|-----------------------------------------------------------------|------------------|
| 1    | 6 y  | SF  | MB                 | Acute onset seizures                                            | D                |
| 2    | 9 y  | SF  | German Shepherd    | 3-mo history of seizures                                        | E                |
| 3    | 2 wk | F   | German Shepherd    | None reported                                                   | D                |
| 4    | 1 y  | M   | MB                 | 2-mo history of lameness, fever, vomiting                       | D                |
| 5    | 2 mo | M   | Newfoundland       | Sudden death                                                    | D                |
| 6    | 1 wk | M   | Chihuahua          | None reported                                                   | D                |
| 7    | 6 y  | CM  | Chihuahua          | 10-d history of vomiting and lethargy                           | D                |
| 8    | 11 y | CM  | Blue Heeler        | Acute hemiparesis and depression after a fight with another dog | D                |
| 9    | 9 y  | SF  | MB                 | Progressive, unspecified clinical signs                         | D                |
| 10   | 3 d  | M   | MB                 | None reported                                                   | D                |
| 11   | 5 y  | CM  | Great Dane         | 4-wk history of anorexia after limb amputation (osteosarcoma)   | D                |
| 12   | 16 y | M   | MB                 | Acute onset seizures and depression                             | E                |
| 13   | 2 y  | M   | Weimaraner         | 1-mo history of lethargy                                        | E                |
| 14   | 5 mo | F   | Great Dane         | Acute respiratory distress and lethargy                         | E                |
| 15   | 13 y | SF  | MB                 | Painful right hip due to fractured femoral head                 | D                |
| 16   | 8 y  | M   | Yorkshire Terrier  | Acute onset seizures                                            | D                |
| 17   | 2 mo | M   | Great Dane         | Acute hematemesis                                               | D                |
| 18   | 10 y | CM  | Labrador Retriever | Acute onset fever and depression                                | D                |
| 19   | 2 wk | F   | Labrador Retriever | 2-d history of diarrhea                                         | D                |
| 20   | 10 y | CM  | MB                 | Acute depression                                                | D                |
| 21   | 1 mo | M   | Labrador Retriever | Depression and seizures                                         | E                |
| 22   | 6 y  | M   | English Bulldog    | Acute onset fever and depression                                | E                |
| 23   | 11 y | M   | MB                 | Sudden death                                                    | D                |
| 24   | 8 y  | SF  | Boxer              | Acute onset depression, vomiting, and diarrhea                  | E                |
| 25   | 10 y | SF  | Golden Retriever   | Weakness due to advanced lymphoma                               | E                |
| 26   | 12 y | F   | Golden Retriever   | None reported                                                   | E                |

|    |       |    |                    |                                |   |
|----|-------|----|--------------------|--------------------------------|---|
| 27 | 9 y   | CM | Labrador Retriever | None reported                  | E |
| 28 | 10 mo | CM | MB                 | Acute onset lateral recumbency | E |

CM = castrated male; D = spontaneous death; E = euthanasia; F = female; M = male; MB = mixed breed; SF = spayed female.

**Supplemental Table 2.** Gross neuropathology, extraneural lesions, putative primary site of infection, and etiology in 28 cases of systemic bacterial infection with neurologic involvement in dogs.

| Case | Gross neuropathology                        | Associated extraneural lesions                                                                                          | Presumed primary site of infection | Bacterial culture (tested tissue)                     |
|------|---------------------------------------------|-------------------------------------------------------------------------------------------------------------------------|------------------------------------|-------------------------------------------------------|
| 1    | Left ventricular empyema                    | Suppurative metritis                                                                                                    | Metritis                           | <i>Streptococcus</i> sp. (brain)                      |
| 2    | None reported                               | Suppurative mitral valve endocarditis with bacterial cocci; renal infarcts                                              | Undetermined                       | <i>Staphylococcus intermedius</i> (brain)             |
| 3    | None reported                               | Suppurative omphalophlebitis; hepatocellular necrosis with bacterial cocci                                              | Omphalo-phlebitis                  | <i>Staphylococcus intermedius</i> (liver)             |
| 4    | None reported                               | Suppurative mitral valve endocarditis with bacterial cocci; renal infarcts                                              | Undetermined                       | <i>Streptococcus</i> sp. (mitral valve)               |
| 5    | None reported                               | Fibrinous pneumonia with bacterial cocci; suppurative myocarditis                                                       | Undetermined                       | Not performed                                         |
| 6    | None reported                               | Suppurative bronchopneumonia; hepatocellular necrosis                                                                   | Broncho-pneumonia                  | <i>Staphylococcus intermedius</i> (lung)              |
| 7    | Meningeal hemorrhages (left occipital lobe) | Necrotizing dermatitis and panniculitis; fibrinous pneumonia                                                            | Dermatitis and panniculitis        | <i>Escherichia coli</i> (lung)                        |
| 8    | Meningeal hemorrhages (brainstem)           | Suppurative and hemorrhagic dermatitis                                                                                  | Cutaneous lesions (fight wounds)   | <i>Klebsiella pneumoniae</i> (lung)                   |
| 9    | Meningeal hemorrhages (left frontal lobe)   | Suppurative mitral valve endocarditis with bacterial cocci; myocardial and splenic infarct; suppurative panophthalmitis | Undetermined                       | <i>Staphylococcus pseudintermedius</i> (mitral valve) |

Neuropathology of sepsis in dogs

|    |                                                             |                                                                                                                 |                                      |                                              |
|----|-------------------------------------------------------------|-----------------------------------------------------------------------------------------------------------------|--------------------------------------|----------------------------------------------|
| 10 | None reported                                               | Suppurative dermatitis; neutrophilic interstitial pneumonia                                                     | Cutaneous laceration (left rear paw) | <i>Streptococcus canis</i> (lung)            |
| 11 | None reported                                               | Suppurative aortic and mitral valve endocarditis with bacterial cocci; suppurative myocarditis; splenic infarct | Undetermined                         | <i>Staphylococcus aureus</i> (heart, kidney) |
| 12 | None reported                                               | Suppurative myocarditis                                                                                         | Undetermined                         | <i>Streptococcus canis</i> (brain)           |
| 13 | Left ventricular hemorrhage                                 | Suppurative aortic and mitral valve endocarditis with bacterial cocci; splenic infarct                          | Undetermined                         | <i>Corynebacterium</i> sp. (aortic valve)    |
| 14 | None reported                                               | Suppurative pleuropneumonia                                                                                     | Pleuro-pneumonia                     | <i>Escherichia coli</i> (thoracic fluid)     |
| 15 | Meningeal hemorrhages (temporal, parietal, occipital lobes) | Suppurative pyelonephritis; right acetabular osteoarthritis; splenic and cardiac infarct                        | Acute pyelonephritis                 | <i>Escherichia coli</i> (brain, kidney)      |
| 16 | Dark-red areas of necrosis (left telencephalon)             | Ulcerative periodontitis with tooth loss; fibrinous pneumonia                                                   | Widespread periodontitis             | <i>Streptococcus canis</i> (brain)           |
| 17 | None reported                                               | Suppurative bronchopneumonia with bacterial cocci                                                               | Broncho-pneumonia                    | <i>Streptococcus canis</i> (lung)            |
| 18 | None reported                                               | Suppurative mitral valve endocarditis with bacteria; suppurative myocarditis; splenic infarct                   | Undetermined                         | <i>Actinomyces canis</i> (mitral valve)      |
| 19 | None reported                                               | Hemorrhagic pneumonia                                                                                           | Pneumonia                            | <i>Escherichia coli</i> (lung, spleen)       |
| 20 | Meningeal hemorrhage (left occipital and piriform lobe)     | Suppurative mitral valve endocarditis with bacterial cocci                                                      | Undetermined                         | <i>Streptococcus canis</i> (mitral valve)    |
| 21 | None reported                                               | Fibrinous interstitial pneumonia                                                                                | Pneumonia                            | <i>Streptococcus canis</i> (brain, lung)     |
| 22 | Meningeal hemorrhage (cerebellum, piriform lobes)           | Suppurative pyelonephritis; suppurative mitral valve endocarditis; suppurative myocarditis and panophthalmitis  | Acute pyelonephritis                 | <i>Pseudomonas aeruginosa</i> (mitral valve) |
| 23 | None reported                                               | Suppurative bronchopneumonia with bacterial bacilli                                                             | Broncho-pneumonia                    | <i>Klebsiella pneumoniae</i> (brain)         |
| 24 | Meningeal hemorrhages (telencephalon)                       | Suppurative mitral valve endocarditis with bacterial cocci; renal infarct                                       | Undetermined                         | No bacterial growth (brain)                  |

Neuropathology of sepsis in dogs

|    |                                                            |                                                                                                                        |                      |                                                        |
|----|------------------------------------------------------------|------------------------------------------------------------------------------------------------------------------------|----------------------|--------------------------------------------------------|
| 25 | Meningeal hemorrhages (telencephalon)                      | Suppurative mitral valve endocarditis with bacterial cocci; suppurative myocarditis and splenitis with bacterial cocci | Undetermined         | <i>Staphylococcus pseudintermedius</i> (spleen, heart) |
| 26 | None reported                                              | Suppurative pyelonephritis; suppurative mitral valve endocarditis                                                      | Acute pyelonephritis | <i>Pseudomonas aeruginosa</i> (kidney)                 |
| 27 | Meningeal hemorrhages (ventral brain)                      | Suppurative mitral valve endocarditis; suppurative myocarditis; splenic infarct                                        | Undetermined         | Unidentified bacteria (spleen)                         |
| 28 | Meningeal hemorrhages (right temporal and occipital lobes) | Lymphoplasmacytic pyelonephritis                                                                                       | Acute pyelonephritis | <i>Enterococcus faecium</i> (brain)                    |

**Supplemental Table 3.** Neurohistologic changes in 28 cases of systemic bacterial infection with neurologic involvement in dogs.

| Case | MD    | Histologic changes  |                               |                          |                 |             | Intralesional bacteria |                  |
|------|-------|---------------------|-------------------------------|--------------------------|-----------------|-------------|------------------------|------------------|
|      |       | Leptomeningitis     | Polioencephalitis             | Leukoencephalitis        | Choroiditis     | Ependymitis | H&E                    | GS               |
| 1    | C, BS | Absent              | S, LP, G                      | S, LP, F, G, VL, FC      | S, LP           | S, LP       | No                     | No               |
| 2    | T     | Absent              | S, H, G, PN, VL               | S, H, G, PN              | LP              | Absent      | No                     | No               |
| 3    | T, C  | LP                  | Absent                        | LP, H                    | Absent          | Absent      | No                     | No               |
| 4    | T     | MX, F, VL, TH, FC   | S, NN, G                      | MX, H, VAC               | MX              | Absent      | Yes                    | Yes (G+ cocci)   |
| 5    | T     | S, F, VL, TH, FC, H | S, F, VL, TH, FC, H, NN       | VL, FC, H, G, VAC        | Absent          | Absent      | No                     | No               |
| 6    | T     | MX                  | MX, TH                        | MX, TH                   | Absent          | Absent      | No                     | Yes (G+ cocci)   |
| 7    | T     | S, F, H             | Absent                        | Absent                   | S               | Absent      | No                     | No               |
| 8    | T, C  | MX, F, VL, H        | NN, G                         | S, F, WPN, FC, H, VAC, G | MX              | S, F        | No                     | No               |
| 9    | T, C  | MX, H               | S, H                          | S                        | Absent          | Absent      | Yes                    | Yes (G+ cocci)   |
| 10   | T     | MX                  | Absent                        | Absent                   | Absent          | Absent      | Yes                    | Yes (G+ cocci)   |
| 11   | T     | Absent              | S, PN                         | S, PN                    | Absent          | Absent      | No                     | No               |
| 12   | T     | MX, F, H            | M                             | Absent                   | Absent          | Absent      | Yes                    | Yes (G+ cocci)   |
| 13   | T     | S, H                | MX, VL, FC, H, NN, G          | MX, H, PN                | MX              | Absent      | Yes                    | Yes (G+ bacilli) |
| 14   | T     | MX                  | Absent                        | Absent                   | Absent          | Absent      | No                     | No               |
| 15   | T     | MX, F, H            | G, VAC                        | Absent                   | Absent          | Absent      | No                     | No               |
| 16   | T     | MX, F, VL, FC, H    | S, VL, FC, H, NN, G, VAC      | MX, VL, FC, H, G, VAC    | Absent          | Absent      | No                     | No               |
| 17   | T     | MX, H               | Absent                        | Absent                   | Absent          | Absent      | No                     | No               |
| 18   | T     | MX                  | MX, VL, FC                    | Absent                   | Absent          | Absent      | No                     | No               |
| 19   | T     | LP                  | Absent                        | Absent                   | Absent          | Absent      | No                     | No               |
| 20   | T     | MX, H               | S, VL, FC, H, G, VAC          | MX, VL, FC, G, VAC       | Absent          | Absent      | Yes                    | Yes (G+ cocci)   |
| 21   | T     | MX, H               | S, VL, FC, H, NN, WPN, G      | S, VL, FC, H, WPN, G     | S, F, VL, FC, H | S, F        | Yes                    | Yes (G+ cocci)   |
| 22   | T, C  | S, H                | MX, VL, FC, TH, H, NN, WPN, G | MX                       | Absent          | Absent      | No                     | No               |
| 23   | T     | S, H                | S, VL, H, TH, NN              | MX                       | Absent          | Absent      | No                     | No               |

## Neuropathology of sepsis in dogs

|    |       |         |                         |                          |        |        |     |                |
|----|-------|---------|-------------------------|--------------------------|--------|--------|-----|----------------|
| 24 | T     | MX      | H, PN, WPN              | Absent                   | Absent | Absent | No  | No             |
| 25 | T, BS | S, F, H | S, VL, FC, H, NN        | S, VL, FC, H             | Absent | Absent | No  | Yes (G+ cocci) |
| 26 | T     | Absent  | S                       | Absent                   | Absent | Absent | No  | No             |
| 27 | T, C  | MX, H   | S, VL, FC, TH, H,<br>NN | S, VL, FC, TH, H,<br>VAC | LP     | Absent | No  | No             |
| 28 | T     | S, H    | H                       | H                        | Absent | Absent | Yes | Yes (G+ cocci) |

BS = brainstem; C = cerebellum; F = fibrinous; FC = fibrinoid change; G = gliosis; GS = Gram stain; H = hemorrhage; LP = lymphoplasmacytic; MD = main neuroanatomic distribution; MX = mixed inflammation (lymphoplasmacytic with neutrophils and macrophages); NN = neuronal necrosis; PN = parenchymal necrosis; S = suppurative; T = telencephalon; TH = thrombosis; W = widespread; WPN = widespread parenchymal neutrophils; VAC = vacuolation; VL = vasculitis.
